# Supplementary material for: Early Time-Restricted Feeding Amends Circadian Clock Function and Improves Metabolic Health in Male and Female Nile Grass Rats
Source: MDPI journal article supplement (doi:10.3390/medicines9020015), 2022-02-21
Supplement: s1 [file s1]

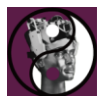

Table S1. A list of qPCR primers was used in the study.

| Genes        | Forward primer          | Reverse primer        |
|--------------|-------------------------|-----------------------|
| <i>Gapdh</i> | GCCTTCCGTGTTCTACC       | CCTCAGTGTAGCCCAAGATG  |
| <i>Per1</i>  | CCACTGAGAGCAGCAAGAGTACA | CTGCTGCAGCCACTGGTAGA  |
| <i>Per2</i>  | TCACCGTAGGAGATCCGGAAT   | TTTCTGCAACAGGTGCTTCCT |

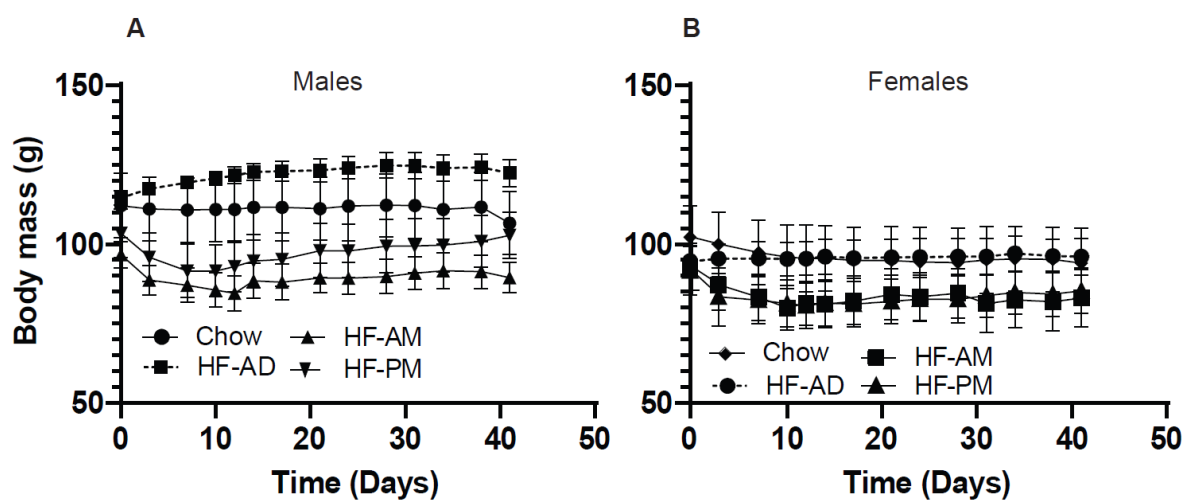

Figure S1. Time-restricted high-fat feeding of male and female NRGs. Bodyweight comparison during the intervention period between the treatment groups for male (A) and female (B) Nile grass rats. Values are mean  $\pm$  SD,  $n=3-5$  animals/group. No significant difference was detected.

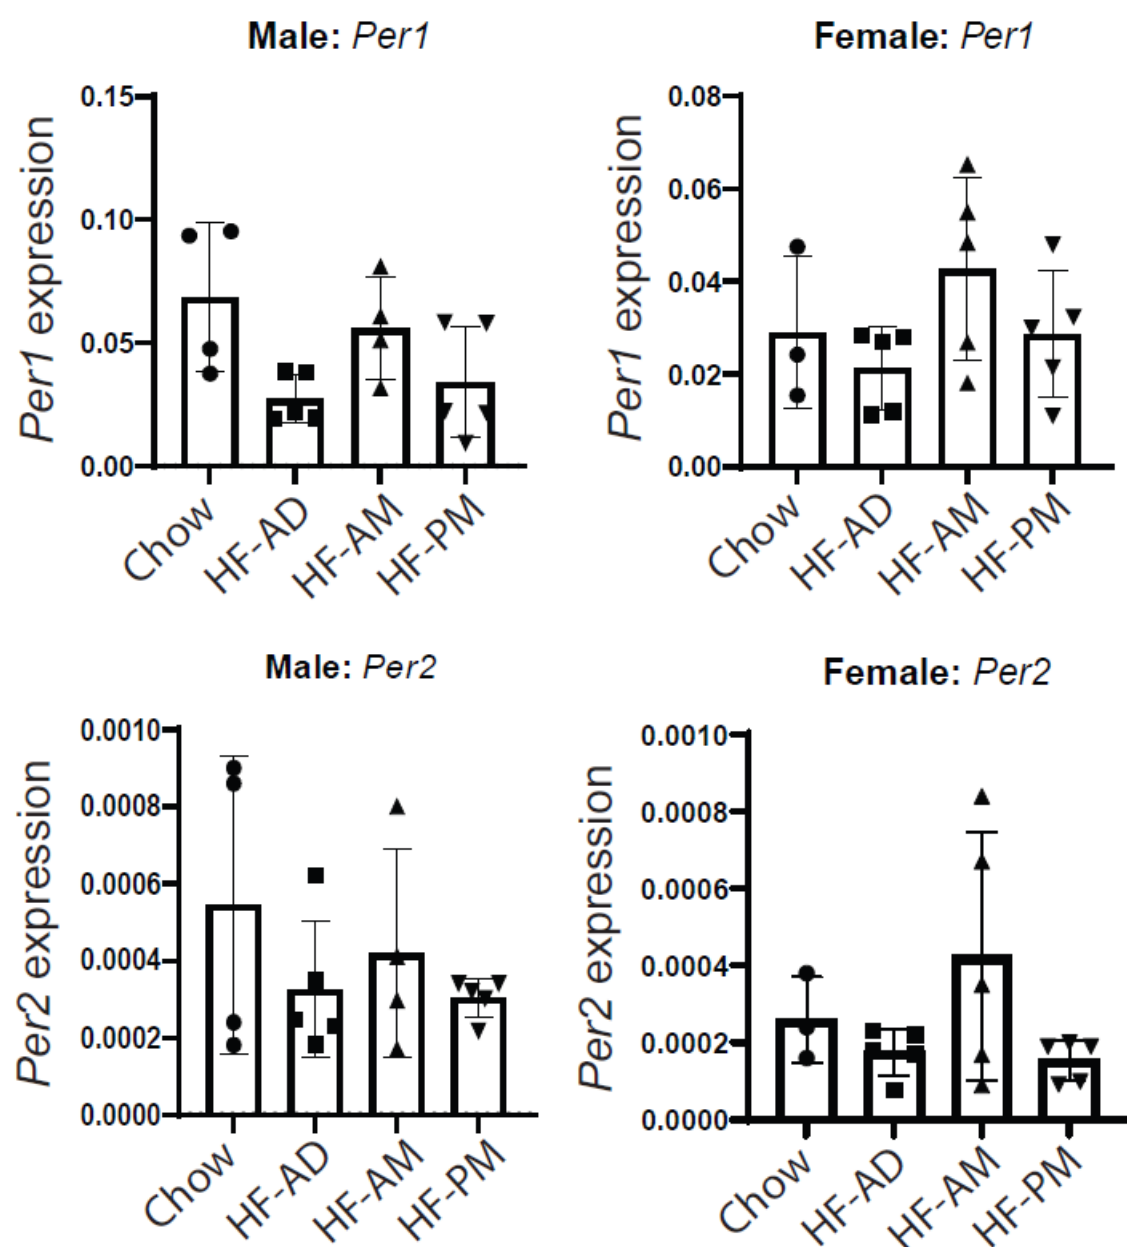

**Figure S2: Clock genes *Per1* and *Per2* expression.** Expression of *Per1* and *Per2* in liver samples of male and female Nile grass rats. Values are mean  $\pm$  SD,  $n=3-5$  animals/group. No significant difference was detected.
